# Supplementary material
Source: PubMed Central journal article supplement (PMC3394195)
Supplement: neo1406_0526SD1.pdf [file neo1406_0526SD1.pdf]

**Table W1.** Summary of Methylation Frequencies, Mean Methylation Levels and *t* Test Results of *RANK/TNFRSF11A* in All Investigated Gliomas.

| WHO Grade | Methylated Samples | Mean Methylation Level | <i>t</i> Test                                                                                                                       |  |  |  |        |  |       |
|-----------|--------------------|------------------------|-------------------------------------------------------------------------------------------------------------------------------------|--|--|--|--------|--|-------|
| AII       | 8/14               | 24.5%                  | <table border="1"> <tr> <td></td> <td></td> </tr> <tr> <td></td> <td>*.0035</td> </tr> <tr> <td></td> <td>*.046</td> </tr> </table> |  |  |  | *.0035 |  | *.046 |
|           |                    |                        |                                                                                                                                     |  |  |  |        |  |       |
|           | *.0035             |                        |                                                                                                                                     |  |  |  |        |  |       |
|           | *.046              |                        |                                                                                                                                     |  |  |  |        |  |       |
| AAIII     | 17/22              | 28.9%                  |                                                                                                                                     |  |  |  |        |  |       |
| sGBMIV    | 20/23              | 40.2%                  |                                                                                                                                     |  |  |  |        |  |       |
| pGBMIV    | 81/97              | 33.3%                  |                                                                                                                                     |  |  |  |        |  |       |

.3767

\*.026

For *t* test, the mean methylation levels of all investigated glioma entities were tested against each other.  
 \*Significant difference between the methylation levels in different WHO grades (*t* test): AII versus AAIII, *P* = .3767; AII + AAIII versus pGBMIV, *P* = .026; AII + AAIII versus sGBMIV, *P* = .0035; and pGBMIV versus sGBMIV, *P* = .046.

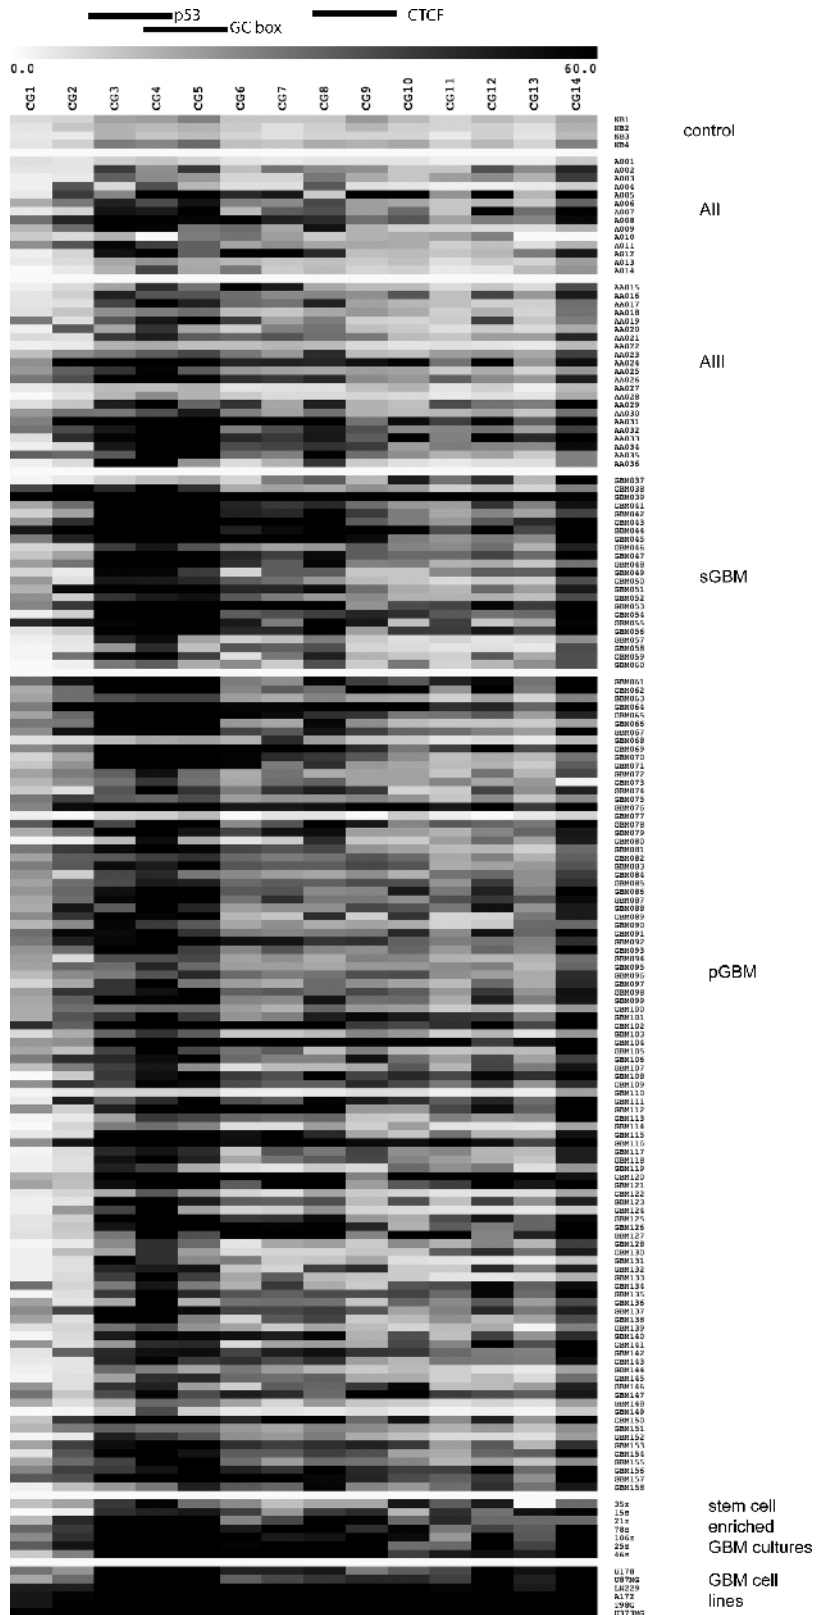

**Figure W1.** Quantitative methylation data of 156 primary glioma and all investigated cell cultures. The localization of the putative p53 and CTCF binding sites and a GC box are indicated. The color code shows the methylation range (0%-60%).

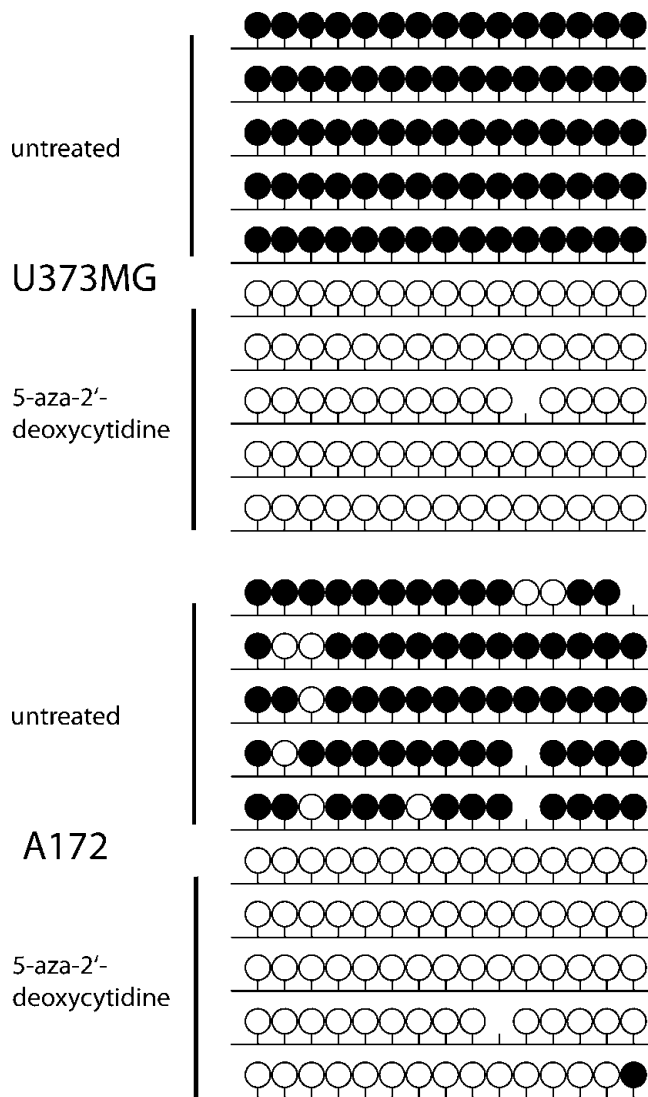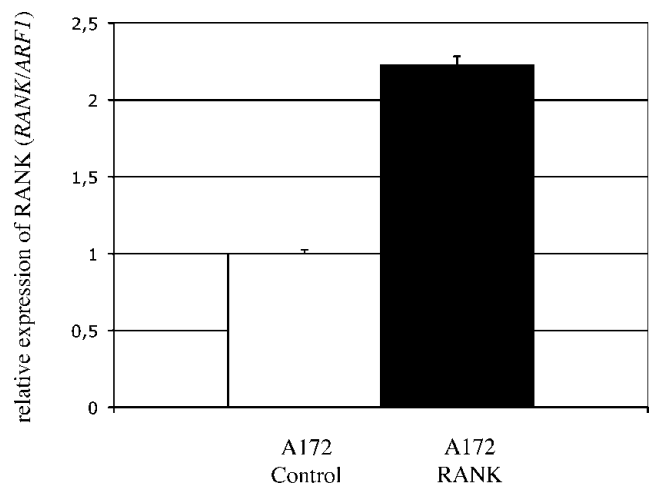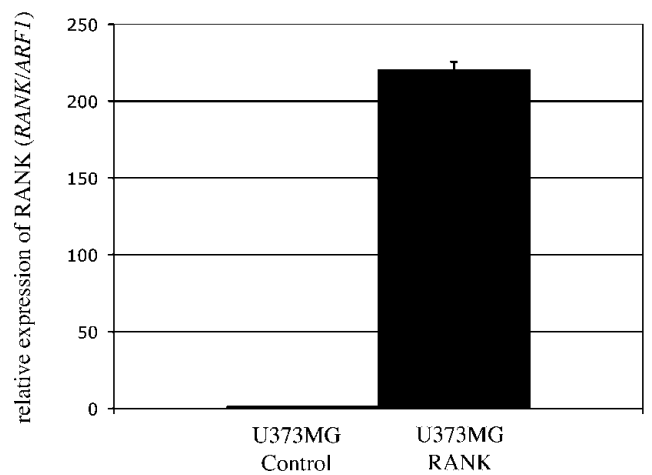

**Figure W2.** Representative bisulfite sequencing analysis of 5-aza-2'-deoxycytidine-treated and -untreated U373MG and A172 cells showing demethylation within the analyzed region of *RANK/TNFRSF11A*. Black lollipop indicates methylated CpG position; white lollipop, unmethylated CpG position; no circles, uncertain because of the low-quality sequence trace.

**Figure W3.** Relative transcript levels of *RANK/TNFRSF11A* (*RANK/TNFRSF11A/ARF1*) analyzed by real-time RT-PCR in the glioblastoma cell line U373MG after stable transfection with RANK-pcDNA4/myc-His plasmid (■) or control vector pcDNA4/myc-His (□).

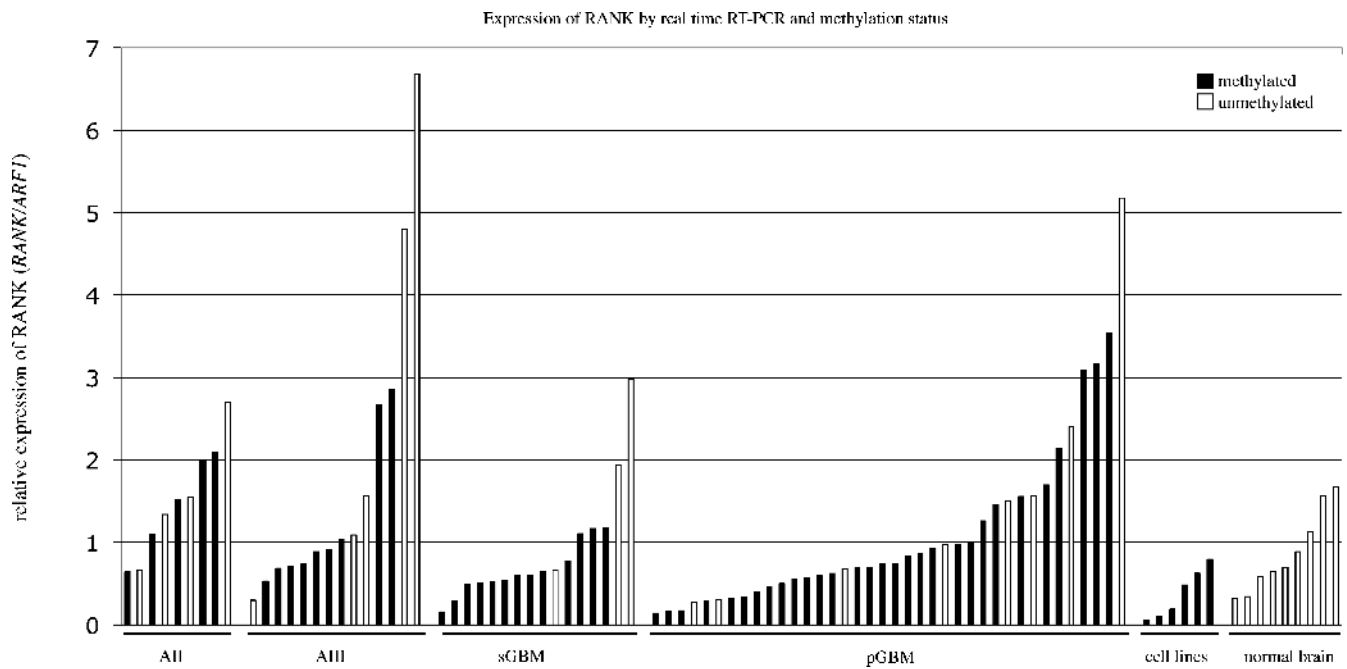

**Figure W4.** mRNA expression analysis of *RANK/TNFRSF11A* in gliomas, glioblastoma cell lines, and normal brain tissues. This figure shows the relative expression levels of *RANK/TNFRSF11A* (*RANK/TNFRSF11A/ARF1*) obtained by real-time RT-PCR. Results of methylation analysis by pyrosequencing are included in this figure. Black column (■) indicates that the sample is methylated; white column (□), sample is unmethylated. Samples were scored methylated if they exceeded the two-fold SD of white matter control samples (20.3%).
